# Supplementary material for: The Burden of Osteoarthritis in the Middle East and North Africa Region From 1990 to 2019
Source: Frontiers journal article supplement (doi:10.3389/fmed.2022.881391), 2022-06-23

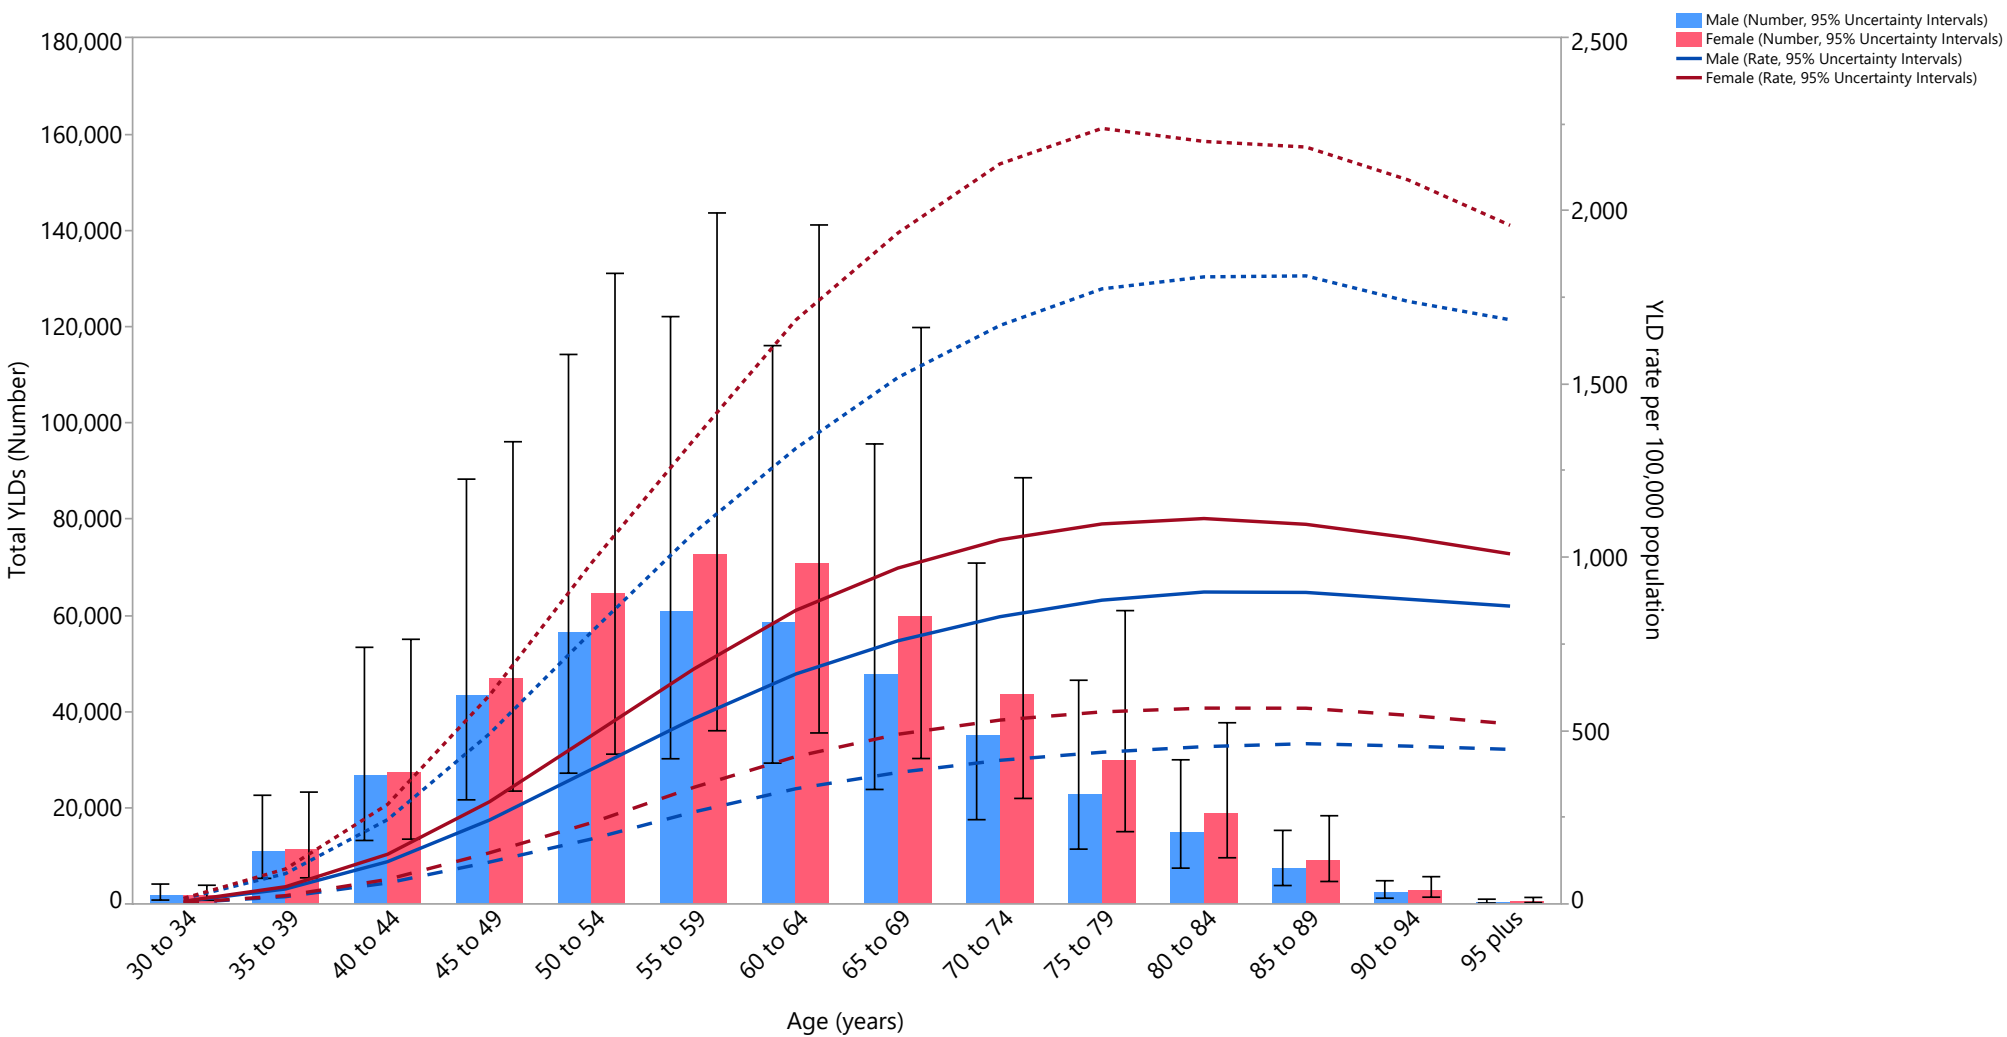

Supplement: Image_8.PDF [file Image_8.PDF]
